# 1 Transposon- and genome dynamics in the fungal genus *Neurospora*: insights 2 from nearly gapless genome assemblies

3

## 4 **Authors:**

5 Diem Nguyen<sup>1</sup>, Valentina Peona<sup>1</sup>, Per Unneberg<sup>2</sup>, Alexander Suh<sup>1,3</sup>, Patric Jern<sup>4</sup>, Hanna  
6 Johannesson<sup>1</sup>

7

## 8 **Affiliations:**

9 <sup>1</sup> Department of Organismal Biology, Evolutionary Biology Centre, Uppsala University, SE-  
10 75236 Uppsala, Sweden

11 <sup>2</sup> Department of Cell and Molecular Biology, National Bioinformatics Infrastructure Sweden,  
12 Science for Life Laboratory, Uppsala University, SE-75237 Uppsala, Sweden

13 <sup>3</sup> School of Biological Sciences, University of East Anglia, Norwich Research Park, NR4  
14 7TU, Norwich, United Kingdom

15 <sup>4</sup> Science for Life Laboratory, Department of Medical Biochemistry and Microbiology,  
16 Uppsala University, Uppsala, SE-75123, Sweden

17

## 18 **Email addresses:**

19 DN: diem.nguyen@ebc.uu.se

20 VP: valentina.peona@ebc.uu.se

21 PU: per.unneberg@scilifelab.se

22 AS: alexander.suh@ebc.uu.se

23 PJ: patric.jern@imbim.uu.se

24 HJ: Hanna.Johannesson@ebc.uu.se

25

26 **Corresponding author:**

27 Hanna Johannesson

28 Department of Organismal Biology, Evolutionary Biology Centre, Uppsala University, SE-

29 75236 Uppsala, Sweden

30 Hanna.Johannesson@ebc.uu.se

31

32 **Keywords:**

33 transposable elements, genome evolution, genome defense, Repeat-Induced Point (RIP)

34 mutation, Neurospora

35

36

37

38

39

40

41

42

43

44

45

46

47

48

49

50

# 51    **Abstract**

52    **Background.** A large portion of nuclear DNA is composed of transposable element (TE)  
 53    sequences, whose transposition is controlled by diverse host defense strategies in order to  
 54    maintain genomic integrity. One such strategy is the fungal-specific Repeat-Induced Point  
 55    (RIP) mutation that hyper-mutates repetitive DNA sequences. While RIP is found across  
 56    Fungi, it has been shown to vary in efficiency. To date, detailed information on the TE  
 57    landscapes and associated RIP patterns exist only in a few species belonging to highly  
 58    divergent lineages.

59    **Result.** We investigated 18 nearly gapless genome assemblies of ten *Neurospora* species,  
 60    which diverged from a common ancestor about 7 MYA, to determine genome-wide TE  
 61    distribution and their associated RIP patterns. We showed that the TE contents between 8.7-  
 62    18.9% covary with genome sizes that range between 37.8-43.9 Mb. Degraded copies of Long  
 63    Terminal Repeat (LTR) retrotransposons were abundant among the identified TEs, and these  
 64    are distributed across the genome at varying frequencies. In all investigated genomes, TE  
 65    sequences had signs of numerous C-to-T substitutions, suggesting that RIP occurred in all  
 66    species. RIP signatures in all genomes correlated with TE-dense regions.

67    **Conclusions.** Essentially gapless genome assemblies allowed us to identify TEs in  
 68    *Neurospora* genomes, and reveal that TEs contribute to genome size variation in this group.  
 69    Our study suggests that TEs and RIP are highly correlated in *Neurospora*, and hence, the  
 70    pattern of interaction is conserved over the investigated evolutionary timescale. We show that  
 71    RIP signatures can be used to facilitate the identification of TE-rich region in the genome.

72

73

74

75

## 76 **Background**

77 Advanced sequencing technologies have yielded numerous genome assemblies of high  
78 quality from diverse species across the tree of life (from NCBI Assembly database, [1]).  
79 Despite the availability of these assemblies, there are still difficult-to-sequence genomic  
80 regions, such as repetitive sequences and centromeres [2, 3]. The inability to sequence these  
81 regions has limited studies of genome architecture and evolution, which depend on data from  
82 multiple genomes. Thus, availability of high-quality gapless genome assemblies from  
83 multiple individuals and species are critically needed, particularly to understand how  
84 repetitive sequences contribute to genome size evolution and how genome integrity is  
85 maintained.

86 Genomes are dynamic entities, subject to large and small-scale rearrangement events  
87 that can lead to gains and losses of genomic DNA sequences. Transposable elements (TEs)  
88 are genetic elements present in eukaryotic and prokaryotic genomes, characterized by their  
89 ability to propagate in the genome. While TEs may contribute to evolutionary change and  
90 innovation [4], TE activity can lead to deleterious effects including insertional disruption of  
91 functionally important sequences such as promoters or genes themselves, gene miss-  
92 expression, and silencing of adjacent genes [5, 6]. TEs can also mediate ectopic  
93 recombination between distant chromosomal regions, inversions, and deletion of genomic  
94 sequences [7, 8].

95 Based on the nature of their transposition intermediates, TEs can be classified as class  
96 I RNA retrotransposons (RNA intermediate) or class II DNA transposons (DNA  
97 intermediate) [9, 10]. They are further divided into subclasses, orders, and super-families  
98 based on their specific structural and coding features. Class I elements, consisting of LTR  
99 retroelements, LINEs (Long Interspersed Nuclear Elements) and SINEs (Short Interspersed

Nuclear Elements), are the most frequent class of TEs in many animals (e.g., *Drosophila melanogaster*), plants (e.g., *Arabidopsis thaliana* and maize), and fungi [11-14].

To counterbalance potential detrimental side effects of genome-damaging agents, genome defense mechanisms have evolved to ensure the maintenance of genome integrity [15-17, 18]. Eukaryotes have evolved ways to defend their genomes against TEs [Gladyshev, 2016 #2852]. For example, plants and animals utilize methylation and RNA interference (RNAi)-based mechanisms [19, 20]. In fungi, one such mechanism is sequence homology-based Repeat-Induced Point (RIP) mutation [21, 22]. First discovered in *Neurospora crassa*, RIP permanently mutates duplicated sequences, such as TEs, and introduces multiple C-to-T transition mutations, predominantly at CpA dinucleotides, in both copies of the sequences, skewing dinucleotide frequencies towards an over-representation of TpA in mutated sequences [21, 22]. For RIP mutations to occur, there are requirements for minimal duplicated sequence length of about 400 base pairs (bp), though sequences as short as 155 bp have been reported, and sequence identity of greater than 80% [23-25]. In evolutionarily diverged fungal species where RIP has been experimentally demonstrated, RIP is “leaky”, and intact and active TEs are present in the genomes, reviewed in [26]. In contrast, RIP is considered highly efficient in *N. crassa* and has resulted in the essential absence of intact and active TEs [27].

Here we study the distribution of TEs and RIP in the filamentous fungal genus *Neurospora*. The motivation of our study is fourfold. First, the genus *Neurospora* represents a tractable system; it has small genomes relative to other eukaryotes (~43 Mb) [28, 29], and the model organism *Neurospora crassa* is well-studied and has a well-annotated genome [30]. Second, despite its relatively small genome, about 10% of the *Neurospora* genome is comprised of repetitive DNA sequences [29]. Third, the efficiency of RIP varies across the kingdom Fungi. In *N. crassa* RIP is thought to be efficient at controlling transposons, while

in distantly related fungi, RIP is “leaky” resulting in the persistence and presence of active TEs [27]; comparisons over short evolutionary time is needed to understand the evolution of this key genomic feature. Fourth, in addition to the well-studied *N. crassa*, the phylogenetic relationship between species whose last common ancestor of the clade of *Neurospora* diverged within the last 7 million years, is well resolved [31-34], providing a phylogenetic framework for studies of genome evolution in this group of fungi [35]. Altogether, *Neurospora* genomes present a well-suited model system for studying the relationship between TEs and genome defense.

Our study of the TE landscape in *Neurospora* was facilitated by high-quality nearly gapless genome assembly of long-read sequenced genomes. We thus comprehensively surveyed TEs based on their diversity, sequence abundance, and chromosomal distribution in each genome assembly, and compared these features between and within species to better describe the dynamics of TE variability. Furthermore, we determined how RIP associated with TEs among the different genomes in this *Neurospora* clade to better understand whether RIP efficiency in *N. crassa* is a general feature of *Neurospora*. With our study, we provide novel insights into the application of genome-wide RIP index to identify TE enriched locations in the genome, when identifying TEs in genomes heavily affected by RIP is not possible.

## Results

### *Nearly gapless Neurospora assemblies*

To study the TE and RIP landscapes of closely-related *Neurospora* species (**Figure 1**) [31, 36, 37], we generated PacBio assemblies from four genomes, of which two previously lacked genomic information [*N. hispaniola* (FGSC 8817), and *N. metzenbergii* (FGSC 10397)]

(**Table S1**). Genomic data from *N. intermedia* (FGSC 8767) and *N. discreta* (FGSC 8579), generated using short-read sequencing technologies, have previously been published [38, 39]. Additionally, we used 11 previously published PacBio-sequenced genome assemblies [i.e. from the genomes of *N. intermedia* (FGSC 8761, 8767), *N. sitophila* (FGSC 5940, 5941, W1426, and W1434), and *N. tetrasperma* (FGSC 2503, 2504, 9045, 9046, and 10752)] [39-43]. Reference assemblies are available for *N. crassa* (FGSC 2489) and *N. tetrasperma* L6 (FGSC 2508, 2509) [29, 44]. In total, we analyzed 18 genomes from 10 *Neurospora* species, of which 15 genomes were PacBio-sequenced, resulting in dense taxon sampling both across the phylogeny and within specific species (*N. sitophila* (4 strains) and *N. intermedia* (3 strains)) (**Figure 1, Table S1**).

The assemblies of the PacBio-sequenced genomes were nearly gapless. We recovered contigs that could be anchored to the seven chromosomes in each of the PacBio genome assemblies that were collinear with the seven chromosomes in *N. crassa* [45], indicating that our assemblies were at the chromosome level. One assembly (strain FGSC 5940) had no gaps [the one excess contig is mitochondrial DNA], and from three other strains (W1434, and FGSC 8807 and 9046) we identified up to 8 unplaced contigs that represent gaps in the assembly resulting from the repetitive ribosomal RNA genes. Two strain of *N. intermedia* (FGSC 8767 and 8761) had particularly more “gappy” assemblies, where 24 and 10 contigs mapped to the 7 *N. crassa* chromosomes, respectively. For all PacBio assemblies, the 1 to 29 unplaced contigs that could not be mapped to the *N. crassa* reference genome were mitochondrial DNA and ribosomal RNA genes. The genome assemblies for examined *Neurospora* genus ranged between 37.8 and 43.9 Mb, and *N. crassa* was 41 Mb (**Table S1**).

*The curated Neurospora TE library*

TE identification in the nearly gapless genome assemblies involved sequence similarity searches based on a modified version of an existing query repeat sequence library [46]. The original 978 repeats library was curated and reduced to 844 repeats. Specifically, we removed cellular genes and sequences lacking transposon features such as transposase, reverse transcriptase, RNaseH, integrase, *gag*, protease. Consensus sequences for elements previously identified by RepeatModeler that had no identified domains in the NCBI Conserved Domain Database were retained in the library. However, full-length LTR retrotransposon candidates determined by LTRharvest that had no identifiable domains or had only CHROMO domains, or were cellular genes, were removed. An additional 41 *N. crassa* TE sequences obtained from NCBI GenBank, from Selker et al. [47], and from Wang et al. [48] were added to the updated TE query library for a total of 885 repeats for RepeatMasker analyses, and the library has been made available at: <https://doi.org/10.6084/m9.figshare.c.4310996> [49].

# *Genomic TE content rich in LTR retrotransposons*

The *Neurospora* genomes were comprised of both Class I RNA retrotransposon and Class II DNA transposon sequences. These TE sequences represented 7.66 Mb of genomic DNA (17.43% of genome) in *N. metzenbergii*, the species with the largest genome. In two of the species with the smallest genomes, these TEs represented less than 4 Mb of the genomes (*N. sitophila*: 3.45 Mb, 9.11% of genome; and *N. discreta*: 3.95 Mb, 10.46% of genome) (**Figure 1; Table S2**). We found that TE comprised 13.02% (5.34 Mb) of the *N. crassa* genome, which is similar to a previous report [29].

The proportion of genomes occupied by the different TE families (e.g., LTR retrotransposon, LINE, or DNA elements) varied considerably among the *Neurospora* species (**Figure 1, Figure S1**). However, the LTR retrotransposon sequences were most



abundant in all *Neurospora* genomes (**Figure 1**). They made up the largest fraction of the TE sequences (1.44 - 3.85 Mb or 3.74 - 8.77% of genomes), followed by LINE elements (0.34 - 1.20 Mb or 0.86 - 2.74% of genomes), DNA elements (0.09 - 0.51 Mb or 0.24 - 1.17% of genomes), and Unclassified repeats (0.70 - 2.06 Mb or 1.82 - 4.69% of genomes) (**Table S2, Figure S1**).

#### *Genome size correlation with TE content*

In *Neurospora* species, TE content correlated positively with genome size (**Figure 2**), suggesting TE contribution to genome size expansion in *Neurospora*. A number of genomes fell outside the 95% confidence interval of the regression; these genomes either had more or fewer TEs than expected. For example, *N. discreta* and *N. sitophila* (strains FGSC 5940 and W1434, W1426) had more TE sequences than expected relative to their genome sizes, as predicted using the correlation between the remaining species. Alternatively, both strains of each of the *N. tetrasperma* L6, L7 and L8 had fewer TEs than expected relative to their genome sizes (**Figure 2**). When zooming in on the different TE families, we found that LTR retrotransposon and the Unclassified repeats positively correlated with larger genome sizes, while other TEs were weakly or not at all correlated to genome size (**Figure S2**).

#### *TEs locate across all seven Neurospora chromosomes*

Numerous TE sequences were identified on each of the seven *Neurospora* chromosomes, but sliding window analyses suggest certain regions per chromosome were particularly enriched (log2 observed/expected values >2) (**Figure 3, Figure S3**, top panels). Similar patterns of enrichment were observed between orthologous chromosomes in each of the *Neurospora* species (**Figure S3**, top panels).

*RIP signatures were detected in all Neurospora species*

The composite RIP index can be used as a proxy for the RIP activity in a genomic region; positive values indicate that RIP has occurred [50]. For this study, we developed a method to determine genome-wide RIP indices independent of the underlying genomic context. We use the *N. crassa* genome assembly as an example to explain the method that was also applied to all genome assemblies. First, to validate that the composite RIP index could be applied across a genome to indicate regions of RIP activity, we used the *N. crassa* genome as reference and generated mock genomes with equal length to the reference. The mock genomes were generated either by scrambling the sequenced genome or selecting nucleotides based on the observed nucleotide frequencies. Observed TE intervals were randomly placed on the mock genome to calculate composite RIP index. As expected, no RIP signature was observed in the mock genomes (**Figure S4**, “shuffle” and “frequency”), whereas the reference *N. crassa* genome (**Figure S4**, “obs”) indicated RIP activity in some sections but not in others that likely represent gene-rich regions. Similar patterns were observed for the other 17 genomes in this study (**Figure S4**).

Composite RIP index values were also calculated for 10 kb windows, delineated independently of the sequence context or genomic content (e.g., genic regions, repetitive regions) for each genome assembly, and plotted over the length of the chromosome (**Figure 3, Figure S3**, bottom panels). Positive values indicated that a region had experienced RIP activity. Many TEs have RIP signature, based on visual inspection of sequence alignments. Note that these RIPed regions coincided with windows enriched in TEs (**Figure 3, right panels, Figure S5**). Taken together, on a genome-wide scale, TE sequences were observed to have experienced RIP.

*TE partly accounts for intra-species genome size variation*

We observed genome size variation between strains of *N. sitophila* and *N. intermedia* (**Table S1**). To better understand the variation within species, particularly whether TEs accounted for the gain or loss of DNA, we compared the high-quality nearly gapless genome assemblies of four independent *N. sitophila* and three independent *N. intermedia* strains (**Table S1**).

We found genome size differences among *N. intermedia* as the FGSC 8767 assembly was approximately 3.4 Mb smaller than FGSC 8807 and FGSC 8761 (**Table S1**), and the difference was not due to poor data quality, since we confirmed the data quality with Illumina sequenced data. TEs contributed to 1.95 Mb of this size difference, leaving 1.4 Mb unaccounted for the remaining differences (**Table S2**). The FGSC 8767 assembly was, however, more fragmented and 24 contigs mapped to *N. crassa* where each chromosome had between 2 and 7 mapped contigs (e.g., chromosome 1 was assembled from 7 contigs), and an excess of 11 contigs representing gaps in the assembly, due to mitochondrial DNA and ribosomal RNA genes. In contrast, the assemblies for FGSC 8761 and 8807 had 10 and 7 contigs mapped to *N. crassa*, respectively, and correspondingly 17 and 7 gaps, respectively. Therefore, the difference in genome size may be due to unassembled repetitive sequences in the FGSC 8767 genome, demonstrating the importance of high-quality and nearly gapless assemblies for more specific/detailed whole-genome comparisons within and across species.

Among the four *N. sitophila* strains, W1434 had approximately 1 Mb larger genome than the other three strains (W1426, FGSC 5940, FGSC 5941: 37.9-38.4 Mb) (**Table S1**). The W1434 assembly had 7 contigs mapped to *N. crassa* where each chromosome was fully mapped, though there were 7 unmapped contigs that represent mitochondrial DNA and ribosomal RNA genes. The better assembled FGSC 5940 had 7 contigs mapping to *N. crassa* where each chromosome was fully mapped, and 1 mitochondrial DNA contig. In contrast, the W1426 and FGSC 5941 assemblies had 12 and 18 unplaced contigs, respectively, with 8 and 7 contigs mapping to the chromosomes in *N. crassa*. The larger genome size may be a

consequence of different genome rearrangements, for example by accumulation of certain TE families, rather than assembly quality due to fragmentation. Indeed, the size difference could be accounted for by an excess in repetitive sequences that were dispersed along the seven chromosomes (**Figure S3**). The TE content of W1434 was about 0.7 Mb larger (4.25 Mb compared with 3.45-3.58 Mb in W1426, FGSC 5940, FGSC 5941), of which .589 Mb (82%) of sequences were contributed by LTR retrotransposons alone (**Table S2**).

*TEs were recently active in Neurospora*

The current understanding of TEs in *N. crassa* is that they are not active. Whether this dogma is true for other *Neurospora* species could be tested by searching for lineage-specific TE insertions. We scored pairwise alignments of individual TE-flanking regions for TE presence and absence. These insertions indicate recent TE accumulation, and refer to them as “pairwise lineage-specific” herein. In general, few pairwise lineage-specific TEs could be detected; we found between 0 and 23 insertions per genome (**Table S3**). These were either LTR and LINE retrotransposons from 82 subfamilies (**Table S4**). In total, we found 593 pairwise lineage-specific LTR retrotransposons (of which 406 putative full-length insertions; **Tables S3 and S4**) belonging to 76 subfamilies and 509 LINE belonging to 6 subfamilies (**Tables S3 and S4**) suggesting a diversification of LTRs. Most of the insertions (32%) were represented by ncra\_Tad1\_01 LINE subfamily, followed by ncra\_LTR\_69, ntet\_Tad1\_01, Tad1.1 (4% each), ntet\_LTR\_18, ncra\_LTR\_49, ncra\_Tad1\_06 (3% each; **Table S5**).

## Discussion

Genomes integrity is maintained by different mechanisms to ensure genome function and successful transmission of genetic material to the next generation. However, variation in

genomic DNA content can still be observed. Extensive intra- and inter-species variation in genomic content can be found across eukaryotic lineages (e.g., in [51, 52]). The study of genome content variations has been made possible by availability of high-quality genome assemblies via the employment of next generation and newer sequencing technologies, increasingly available at low costs and with increasing efficiency and accuracy.

The first report on the 38 Mb genome assembly of *N. crassa* indicated that 10% of genome consisted of repetitive elements, which were detected based on filtering of alignments longer than 200 bp [29]. In our study, we found that 13% of the genome in *N. crassa* consists of TE sequences. The difference between our studies may be due to the underrepresentation of SINE elements and truncated elements in the original draft genome. We now add to the body of knowledge that closely-related *Neurospora* species have similarly large proportions of their genomes comprised of repetitive elements. Nevertheless, we found variation in repetitive content, both between and also within species. Among our investigated *Neurospora* genomes, TE contents vary between 8.7 and 18.9% of the genome. TE content variation among fungal genomes have been reviewed previously [53], but comparisons have typically been studied in species that have diverged over long evolutionary time scales. For example, *Saccharomyces cerevisiae* had 3.1% of the 12 Mb genome consisting of TEs from five families, all LTR retrotransposons [54], which is in contrast to other species with high TE contents, including *Blumeria graminis* f. *sp. tritici* (90% TEs, 97.4 Mb genome) and *Tuber melanosporum* (60.1% TEs, 123.6 Mb genome) [11, 55]. Here in this study we characterize the variation on a shorter time scale.

Our study involves broad sampling of *Neurospora* species, of which two are represented by multiple strains providing a brief look into population-level variation. These types of data can provide a broader picture of TE dynamics between strains of a species in a population, and over a time scale where TEs can transpose to new sites, rather than a

snapshot provided by one (up to four) strains per species. Large genome size variation among individual species in a population has been attributed to TEs (e.g. [56] and [57]). With sampling of up to four strains in *N. sitophila* and *N. intermedia*, we also saw variation in TE content, though these strains were sampled from diverse locales (*N. sitophila*: Italy and French Polynesia; *N. intermedia*: Taiwan, India, Indonesia). For instance, the larger *N. intermedia* FGSC 8767 is a resistant spore killing Sk-2 strain, while the shorter FGSC 8807 and FGSC 8761 are both sensitive strains to spore killing, and it is possible that TE content correlate with this function, warranting further investigation of the effects of TEs on host genome function and evolution.

Our view of TE dynamics over short evolutionary time is supported by our identified specific TE insertions. These numbers are small, and primarily represented by LTR retrotransposons and LINE elements. We used a conservative analysis pipeline based on identification of orthologous regions flanking the TE and queried whether the corresponding region contains a TE or not (thus intact or uninterrupted by a TE) in the contrasting genome. TEs often clusters and/or nest within other TEs over time [58]. Furthermore, RIP mutations have been shown to extend beyond the duplicated target region [59], complicating identification of orthologous TE flanking sequences between the compared genomes. Thus, the low number of observed genomic pairwise TE differences could be hampered by nested insertion and RIP activities indicating use of broad sampling and sequencing to resolve most individual TE loci along the host phylogeny.

Taken together, our results on variation of TE content among strains and species of *Neurospora*, indicate that, albeit the genome being well protected [60], TEs have been actively transposing in *Neurospora* genomes over the relatively short evolutionary time scale. However, we cannot at this point exclude the possibility that the variation in TE content

between *Neurospora* strains and species is a result of differential loss of an ancestral pool of TEs in the different lineages.

All sampled *Neurospora* genomes were rich in LTR retrotransposons. The abundance of this group of repetitive sequences has also been observed in yeasts, plants and animals [12-14]. One may speculate that LTR retrotransposon sequences are especially numerous in *Neurospora* genomes, because they propagate via an RNA intermediate and copy-paste mechanism, and that they are longer than other numerous elements utilizing similar replication strategies including LINEs and SINEs, thereby contributing larger fractions of nuclear DNA. LTR retrotransposons can also form numerous short solitary LTRs (solo-LTRs) [61]. Furthermore, the fraction of Unclassified repeats was quite large and likely contains solo-LTRs and (non-autonomous) DNA transposons, highlighting a classification problem that contribute to an annotation and detection of TEs problem.

Genome size has been reported to be positively correlated with the abundance of TEs in diverse lineages of eukaryotes [62, 63]. While these studies have been compared across distant and diverged lineages, few have been conducted with closely-related species [64-66]. In our study with *Neurospora* species that diverged from a common ancestor within the last 7 million years, we observed similar genome size-TE correlations. The correlation found in our study is interesting given that TEs are expected to be inactive in *Neurospora*, and indeed, we have verified a conserved genome defense system in this genus. As mentioned above, we cannot rule out that the difference is due to shared common TEs that have been differentially deleted in the different lineages. As previously demonstrated, TEs contribute to genome size evolution, though their net effect on genome size depends on TE accumulation relative to the overall deletion rate [67].

To maintain genome integrity, different organisms have evolved different methods to defend their genomes against parasitic elements [16]. In *Neurospora crassa*, four genome

defense mechanisms control TEs, either post-transcriptionally via RNAi-based mechanisms (e.g. quelling and meiotic silencing of unpaired DNA) or transcriptionally (e.g. RIP) and DNA methylation [15, 68]. RIP has been demonstrated experimentally in other filamentous ascomycetes: *Podospora anserina* [69, 70], *Magnaporthe grisea* [71], *Leptosphaeria maculans* [72] and *Nectria haematococca* [73]. Repetitive regions in *N. crassa* coincided with RIP mutated regions and previously observed to be methylated regions [21, 22].

Our study demonstrates that RIP mutation signatures can be computationally assessed in *Neurospora* similar to previous reports on a wide diversity of ascomycete and basidiomycete fungi [74-76]. We developed a method to assess RIP genome-wide, independent of the underlying genomic content, available in the R package *ripr* (<https://github.com/NBISweden/ripr>). This resource can prove useful to identify genomic regions, e.g., centromeres that are TE rich [77, 78], without identification of TEs first, which can be a difficult task depending on the methods used for detection [79, 80]. The emerging pattern from the present study demonstrating correlation between TEs and RIP will become useful tools in several lines of fungal genome assessments from determining TE content by analyzing a less complicated RIP index. Also, under the assumption that repetitive sequences such as TE frequently accumulate at centromeric regions, RIP screening could facilitate identification of such TE-associated genomic regions.

Detected RIP signatures does not however directly demonstrate RIP activity, as other mutational sources present confounding factor, as observed in retroviruses where A- and T-mutations accumulate following reverse transcription [81, 82]. Additionally, RIP index has been developed from *N. crassa* and dinucleotide contexts in other fungal species can vary, and even include trinucleotide contexts [71, 76, 83], and further tests are needed to establish RIP activity in these species. Comparison of RIP efficiency between fungal species will benefit from experiments to quantify the extent of RIP mutations over a number of sexual



generations in *Neurospora* as has been tested in a related fungal species, *Podospora anserina* (unpublished results).

## Conclusions

Genome evolution studies benefit greatly from availability of nearly gapless genome assemblies. Here, we have generated, analyzed, and made available high-quality nearly gapless fungal (*Neurospora*) genome assemblies. In spite of the conserved RIP machinery in *Neurospora*, we see that TEs are likely transposing in *Neurospora* and variation in TE content within genomes, between genomes of the same species, and among species, that contributes to genome size evolution. Importantly, we developed a method to determine the RIP indices across a genome assembly to identify regions rich in TE sequences.

## Methods

**Strains investigated in the study.** *Neurospora* genomes used in this study were either generated in house or collected from public databases. All strains sequenced for this project were obtained from the Fungal Genetics Stock Center (<http://www.fgsc.net/>) and *N. sitophila* W1434, which was provided by Jacobson et al. [41]. All strains used in this study (**Table S1**) are referred to by their FGSC identification numbers, unless otherwise noted (e.g. W1426 and W1434, which were kindly provided by D. J. Jacobson [41]). We used three publicly available, well-annotated *Neurospora* genome assemblies that included *N. crassa* (*N. crassa* OR74A version 12 (FGSC 2489) [29], sequenced by Broad Institute, corrected for the assembly error detected by Galazka et al. [30]), and *N. tetrasperma* (FGSC 2508 *mat A* and FGSC 2509 *mat a* [44]). Other PacBio generated assemblies were previously published [39, 40, 42, 43]. The remaining genomes were generated following previously published PacBio

sequencing and assembly protocols [39, 42] and are reported for the first time in this study (Table S1).

**TE sequence detection.** Repetitive DNA and TEs were identified using RepeatMasker (Version 4.0.8, <http://www.repeatmasker.org>) with Dfam database of repetitive DNA families obtained 20171107 [84], and RepBase [85], as well as a curated *Neurospora*-specific TE library generated in this study (<https://doi.org/10.6084/m9.figshare.c.4310996>) [49].

To curate the *Neurospora*-specific TE library, we utilized an existing *Neurospora*-specific repetitive sequence library [46] to identify repetitive sequences (TEs, simple repeats and low complexity sequences) in each of the *Neurospora* assemblies and collected results into and updated TE library that included TEs called from of *N. crassa* [29], *N. discreta* (<http://genome.jgi-psf.org/Neudi1/>) and *N. tetrasperma* (<http://genome.jgi-psf.org/Neute1/>) and *Neurospora* species sister to the clade containing *N. discreta* [46]. In summary, the original TE library [46] was compiled with RepeatModeler and LTRharvest, which yielded a total 978 repeats ([http://fungalgenomes.org/public/neurospora/data/repeatlib/Gioti\\_neurospora\\_repeats.renamed.lib](http://fungalgenomes.org/public/neurospora/data/repeatlib/Gioti_neurospora_repeats.renamed.lib)). The TE library was further curated manually because many previously LTRharvest-identified elements were incorrect. All 978 elements were re-assessed, including 274 sequences that were previously identified by LTRharvest, and 566 sequences that were classified by RepeatModeler as “Unknowns”, which may include multicopy genes. LTRharvest-identified repeats were queried against the conserved domain database (CDD, v 3.17, 52910 PSSMs *e-value setting 0.01*.) to determine the presence of LTR retrotransposon-related protein domains (belonging to e.g. *gag*, *pol* (including RNaseH, reverse transcriptase, and integrase), and CHROMO domain) [86, 87]. Sequences were kept in the curated TE library if one of these protein domains were present, except CHROMO domains that required presence of an additional *gag* or *pol* sequence. Cellular genes, with or

without transposon-related domains, were removed. RepeatModeler-classified “Unknown” repeats were queried against the CDD. Repeats with sequence similarity to cellular genes were removed from the curated TE library. Sequences without similarity matches to transposon-related protein domains (or cellular genes) were kept in the library as these could represent non-autonomous transposable elements such as SINEs normally lacking identified protein domains.

RepeatModeler-derived “DNA”, “LTR”, and “LINE” repeats (n=8, 61, and 23 sequences, respectively) were confirmed for presence of transposase- [DNA] or retrotransposon- [LTR, LINE] related protein domains in CDD. RepeatModeler-derived “SINE” repeats (n=40 sequences) were confirmed in the genomic tRNA database (Data Release 18.1 (August 2019)), using tRNAscan-SE webserver (<http://trna.ucsc.edu/tRNAscan-SE/>) and SINEBase [88, 89]. SINE repeats with 100% sequence similarity to a tRNA gene were removed from the curated TE library. The non-redundant nucleotide database (blastn [90]) and Repbase (CENSOR: [91, 92]) were also used to identify transposon similarities for a subset of repeat sequences without conclusive results.

The curated TE library used in this study can be accessed at Figshare (<https://doi.org/10.6084/m9.figshare.c.4310996>) [49]. We analyzed each *Neurospora* assembly using the updated “Gioti\_neurospora\_repeats.renamed.v2\_191004.lib library” (844 TE sequences), the available *Neurospora crassa* TEs from NCBI Genbank (9 TE sequences), as well as additional TEs described by Selker et al. [47] (28 TE sequences) and Wang et al. [48] (4 TE sequences) by using RepeatMasker (RepeatMasker version 4.0.8, run with rmbblastn version 2.6.0+, and combined database: Dfam\_Consensus 20171107 and RepBase Update 20181026). We limited our query library to include TEs from *Neurospora* and thus exclude other fungal repeats reported in RepBase [93]. The RepeatMasker “.tbl” outputs were used to quantify proportions of the assemblies that contained TEs. The RepeatMasker “.out”

outputs were used to calculate the composite RIP index for each of the repeat sequences. Fragmented TEs were not stitched together to create intact TEs, and nested TEs were not disentangled. Here we utilized the RepeatMasker repeat class/family categorization (column 11 in the .out file: DNA, LTR, LINE, SINE, Unclassified, Simple repeat and Low complexity).

**Identification of lineage-specific TE insertions.** In order to identify lineage-specific TEs, we modified the methodology illustrated in [94] for presence and absence alignments of TE insertion flanking DNA. We considered a TE insertion to be species-specific when the flanking DNA (occupied integration site or presence state) in the first species are found unambiguously in close proximity in the second species (unoccupied pre-integration site or absence state). All the occupied integration sites for which we found multiple pre-integration sites or undetermined orthology (e.g. when the species are too evolutionary far away from one another) were classified as unresolved integration sites .

Identification involves two steps. First, we extracted 500 bp flanking the TE insertions from each *Neurospora* assembly (based on the RepeatMasker annotation) and aligned to all other *Neurospora* assemblies. The alignment was filtered for putative unoccupied pre-integration sites by identifying TE flanking DNA that aligned less than 50 bp apart and with at least 70% similarity (to take RIP mutations into account). Second, we required the putative pre-integration sites to be unique and therefore aligned these to the first species. If the putative pre-integration site mapped uniquely and at least for 80% of the locus length to the TE integration site, the insertion was classified as a species-specific insertion. In case the putative pre-integration sites had ambiguous alignments in the first comparison assembly, the insertion was classified as an unresolved site. Finally, when both TE flanking sequences failed to map confidently, the corresponding insertions were classified as

unresolved sites. Scripts can be found in the Github repository

<https://github.com/ValentinaBoP/NeurosporaSpecificTE>.

**TE distribution in the genome.** To determine the distribution of TEs along the *Neurospora* genomes, we calculated log2-ratios of observed to expected TE content in 10-kb non-overlapping sliding windows. For each window, observed TE content was calculated by summing the intersection of the window coordinates with the TE coordinates, as defined in the RepeatMasker output file “.out”. The expected TE content was calculated as the window size times the genome-wide TE fraction.

**Composite RIP index calculations.** RIP indices were calculated for each of the transposon fragments. Frequencies of TpA, ApT, CpA, TpG, ApC, and GpT dinucleotides in each of the fragments were tabulated in the RepeatMasker outputs “.out” file; sequences were extracted using the EMBOSS seqret function [95]. From these frequencies, the ratios TpA/ApT (“RIP product index”) and (CpA+TpG)/(ApC+GpT) (“RIP substrate index”) and the composite RIP index  $[(TpA/ApT) - (CpA+TpG)/(ApC+GpT)]$  were calculated [50, 96]. TEs considered to have experienced RIP mutations are described as  $TpA/ApT > 0.89$  and  $(CpA+TpG)/(ApC+GpT) < 1.03$ , as well as positive values of the composite RIP index [29, 50, 96].

To assess the significance of composite RIP scores for TEs in a *Neurospora* genome, we generated mock sequences on which to calculate null distributions of RIP scores. Mock sequences were generated in two ways, either by shuffling all genome positions or drawing nucleotides at random from the observed nucleotide frequency distribution, preserving genome length in both cases. For each panel in **Figure S4**, three distributions were plotted.

First, the observed RIP distribution for a genome was calculated using the repeats determined by RepeatMasker (“obs”). Second given the positions of the repeats in the genome, RIP scores were recalculated by shuffling the repeat positions for two different cases. A random genome was obtained by shuffling the bases (“shuffle”), and third, generated by sampling nucleotides from the observed nucleotide frequency distribution (“frequency”), Cases 2 and 3 will disrupt all repeat regions such that no RIP signal should be observed. Functions to calculate RIP were implemented in R and are available in the R package ripr (<https://github.com/NBISweden/ripr>).

The correlation between windows with Ripped sequences and windows enriched in TEs were visualized with the segmented package (version 1.2-0) in R (version 3.6.0) [97, 98]. Linear regression models were estimated with two segmented relationships. Estimates of the slopes and breakpoints are provided. The psi (“psi1”) value indicates the breakpoint. The adjusted  $R^2$  (“adjusted R”) value gives an indication of how well the linear models fit the data, adjusted for the number of parameters, and considers both regression lines.

## **Declarations**

## **Ethics approval and consent to participate**

Not applicable

## **Consent for publication**

Not applicable

## **Availability of data and materials**

All previously unpublished raw sequencing reads generated in this study have been deposited at the Sequence Read Archive as BioProject PRJNA622402. All genome assemblies based on PacBio sequencing and reference assemblies, and RepeatMasker tables of repeats for all genomes (“.tbl” and “.out” files) and the curated *Neurospora* TE library have been deposited at Figshare (<https://doi.org/10.6084/m9.figshare.c.4310996>) [49]. The pipeline to determine RIP and TE landscape patterns, and RIP background are contained in an R script also deposited in Figshare.

## **Completing interests**

The authors declare that they have no competing interests.

## **Funding**

This work was funded from a European Research Council grant under the program H2020, ERC-2014-CoG, project 648143 (SpoKiGen; HJ). DTN was partly supported by the Sven och Lilly Lawskis Foundation. PU was financially supported by the Knut and Alice Wallenberg Foundation as part of the National Bioinformatics Infrastructure Sweden at SciLifeLab. AS was supported by Vetenskapsrådet (2016-05139) and FORMAS (2017-01597). PJ was supported by Vetenskapsrådet (2018-03017) and FORMAS (2018-01008).

## **Authors' contributions**

DN, VP, PU analyzed data and all authors participated in data and results interpretation. DN and HJ drafted the manuscript and VP, PU, AS, PJ contributed to writing the manuscript. All authors read and approved the final manuscript.

## **Acknowledgements**

Magdalena Grudzinska-Sterno for preparing the strains for sequencing. Mats Pettersson and Douglas Scofield for scripts and discussion, Björn Nystedt at the National Bioinformatics Infrastructure Sweden at SciLifeLab and the Uppsala TE Jamboree group for helpful discussions.

## **Authors' information**

### **Affiliations**

Department of Organismal Biology, Evolutionary Biology Centre, Uppsala University, SE-75236 Uppsala, Sweden

Diem T. Nguyen, Valentina Peona, Alexander Suh, Hanna Johannesson

Department of Cell and Molecular Biology, National Bioinformatics Infrastructure Sweden, Science for Life Laboratory, Uppsala University, SE-75237 Uppsala, Sweden

Per Unneberg

Science for Life Laboratory, Department of Medical Biochemistry and Microbiology, Uppsala University, Uppsala, SE-75123, Sweden

Patric Jern



588

589 School of Biological Sciences, University of East Anglia, Norwich Research Park, NR4 7TU,  
590 Norwich, United Kingdom

591 Alexander Suh

592

# 593 **Corresponding author**

594 Hanna Johannesson (Hanna.Johannesson@ebc.uu.se)

595 Department of Organismal Biology, Evolutionary Biology Centre, Uppsala University, SE-  
596 75236 Uppsala, Sweden

597

598

599

# 600 **Figure legend**

601

602 Figure 1. Schematic *Neurospora* phylogeny and TE-distributions. The left panel phylogeny  
603 was modified from [31, 36, 99]. The right panel indicate TE composition in each genome de-  
604 termined by calculating the number of TE nucleotides relative to the assembly length (in per-  
605 cent) for each of the TE families (Class I: LTR, SINE, and LINE; Class II: DNA transposons;  
606 Unclassified TEs).

607

608 Figure 2. *Neurospora* genome size correlation with TE content. Total genomic TE lengths (in  
609 base pairs) correlated positively with total *Neurospora* genome assembly lengths. Each  
610 *Neurospora* species was color coded, and multiple strains from different species of *N.*  
611 *tetrasperma* were grouped together.

612

Figure 3. Genome-wide TE landscape and RIP signature along *Neurospora* chromosomes. a) *Neurospora crassa* (model organism), b) *N. metzenbergii* (strain with largest genome), c) *N. discreta* (strain with one of the smallest genome). Top panel for each species indicates the enrichment of transposable element (TE) sequences ( $\log_2(\text{observed repeat (bp)}/\text{expected repeats (bp)})$ ) determined in 10 kb windows. Each dot represents a 10-kb window. Values above 2 are herein described as enriched in TE sequences. Bottom panel for each species indicates the genome-wide composite RIP index, independent of underlying genomic content, determined in 10 kb windows. Each dot represents a 10-kb window. Positive values were herein described as a window contained sequences that experienced RIP mutation. For all plots, the alternating colors between blue and green indicate the alternation between chromosomes, with chromosome numbers following the alignment to *N. crassa*. The lighter shading indicates the presence of multiple contigs for the respective chromosome. Right panel for each species indicates the correlation between a 10-kb window for TEs and the corresponding 10-kb window for composite RIP index. Regression lines were fit using a segmented linear regression model in which the breakpoint (“psi”) is also estimated. The top regression line is the estimated fit for  $\log_2$  scores < psi value (left line) and the bottom regression line is the estimated fit for  $\log_2$  scores > psi value (right line). The adjusted  $R^2$  (“adjusted R”) value calculates fit of the regression lines to the data.

# References:

1. O'Leary NA, Wright MW, Brister JR, Ciufo S, Haddad D, McVeigh R, Rajput B, Robertse B, Smith-White B, Ako-Adjei D, et al: **Reference sequence (RefSeq) database at NCBI: current status, taxonomic expansion, and functional annotation.** *Nucleic Acids Research* 2015, **44**:D733-D745.
2. Johnson JM, Edwards S, Shoemaker D, Schadt EE: **Dark matter in the genome: evidence of widespread transcription detected by microarray tiling experiments.** *Trends in Genetics* 2005, **21**:93-102.

- 643 3. Peona V, Weissensteiner MH, Suh A: **How complete are “complete” genome**  
644 **assemblies?—An avian perspective.** *Molecular Ecology Resources* 2018, **18**:1188-  
645 1195.
- 646 4. Werren JH: **Selfish genetic elements, genetic conflict, and evolutionary innovation.**  
647 *Proceedings of the National Academy of Sciences* 2011, **108**:10863-10870.
- 648 5. Chuong EB, Elde NC, Feschotte C: **Regulatory activities of transposable elements:**  
649 **from conflicts to benefits.** *Nature Reviews Genetics* 2017, **18**:71-86.
- 650 6. Hollister JD, Gaut BS: **Epigenetic silencing of transposable elements: A trade-off**  
651 **between reduced transposition and deleterious effects on neighboring gene**  
652 **expression.** *Genome Research* 2009, **19**:1419-1428.
- 653 7. Gray YHM: **It takes two transposons to tango:transposable-element-mediated**  
654 **chromosomal rearrangements.** *Trends in Genetics* 2000, **16**:461-468.
- 655 8. Cáceres M, Ranz JMa, Barbadilla A, Long M, Ruiz A: **Generation of a widespread**  
656 ***Drosophila* inversion by a transposable element.** *Science* 1999, **285**:415-418.
- 657 9. Wicker T, Sabot F, Hua-Van A, Bennetzen JL, Capy P, Chalhoub B: **A unified**  
658 **classification system for eukaryotic transposable elements.** *Nature Reviews*  
659 *Genetics* 2007, **8**.
- 660 10. Makalowski W, Gotea V, Pande A, Makalowska I: **Transposable elements:**  
661 **Classification, identification, and their use as a tool for comparative genomics.** In  
662 *Evolutionary Genomics: Statistical and Computational Methods*. Edited by Anisimova  
663 M. New York, NY: Springer New York; 2019: 177-207
- 664 11. Amselem J, Lebrun M-H, Quesneville H: **Whole genome comparative analysis of**  
665 **transposable elements provides new insight into mechanisms of their inactivation**  
666 **in fungal genomes.** *BMC Genomics* 2015, **16**:1-14.
- 667 12. Feschotte C, Pritham EJ: **DNA transposons and the evolution of eukaryotic**  
668 **genomes.** *Annual Review of Genetics* 2007, **41**:331-368.
- 669 13. Arabidopsis Genome I: **Analysis of the genome sequence of the flowering plant**  
670 ***Arabidopsis thaliana*.** *Nature* 2000, **408**:796-815.
- 671 14. Schnable PS, Ware D, Fulton RS, Stein JC, Wei F, Pasternak S, Liang C, Zhang J, Fulton  
672 L, Graves TA, et al: **The B73 maize genome: Complexity, diversity, and dynamics.**  
673 *Science* 2009, **326**:1112.
- 674 15. Selker EU: **Genome defense and DNA methylation in *Neurospora*.** *Cold Spring*  
675 *Harbor Symposia on Quantitative Biology* 2004, **69**:119-124.
- 676 16. Johnson LJ: **The genome strikes back: The evolutionary importance of defence**  
677 **against mobile elements.** *Evolutionary Biology* 2007, **34**:121.
- 678 17. Matzke MA, Mette MF, Matzke AJM: **Transgene silencing by the host genome**  
679 **defense: implications for the evolution of epigenetic control mechanisms in plants**  
680 **and vertebrates.** *Plant Molecular Biology* 2000, **43**:401-415.
- 681 18. Blumenstiel JP: **Evolutionary dynamics of transposable elements in a small RNA**  
682 **world.** *Trends in Genetics* 2011, **27**:23-31.
- 683 19. Colot V, Rossignol J-L: **Eukaryotic DNA methylation as an evolutionary device.**  
684 *BioEssays* 1999, **21**:402-411.
- 685 20. Zeng J, Gupta VK, Jiang YM, Yang B, Gong L, Zhu H: **Cross-Kingdom Small RNAs**  
686 **among Animals, Plants and Microbes.** *Cells* 2019, **8**.
- 687 21. Selker EU: **Premeiotic instability of repeated sequences in *Neurospora crassa*.**  
688 *Annual review of genetics* 1990, **24**:579-613.

- 689 22. Selker EU: **Repeat-induced gene silencing in fungi**. In *Advances in Genetics. Volume*  
690 *Volume 46*. Edited by Jay CD, Wu C-t: Academic Press; 2002: 439-450
- 691 23. Cambareri E, Singer M, Selker E: **Recurrence of repeat-induced point mutation (RIP)**  
692 **in *Neurospora crassa***. In *Genetics*. 1991
- 693 24. Watters MK, Randall TA, Margolin BS, Selker EU, Stadler DR: **Action of repeat-**  
694 **induced point mutation on both strands of a duplex and on tandem duplications of**  
695 **various sizes in *Neurospora***. *Genetics* 1999, **153**:705-714.
- 696 25. Gladyshev E, Kleckner N: **Direct recognition of homology between double helices of**  
697 **DNA in *Neurospora crassa***. *Nature Communications* 2014, **5**:3509.
- 698 26. Hane JK, Williams AH, Taranto AP, Solomon PS, Oliver RP: **Repeat-Induced Point**  
699 **Mutation: A fungal-specific, endogenous mutagenesis process**. In *Genetic*  
700 *Transformation Systems in Fungi, Volume 2*. Edited by van den Berg MA,  
701 Maruthachalam K. Cham: Springer International Publishing; 2015: 55-68
- 702 27. Galagan JE, Selker EU: **RIP: the evolutionary cost of genome defense**. *Trends in*  
703 *Genetics* 2004, **20**.
- 704 28. Borkovich KA, Alex LA, Yarden O, Freitag M, Turner GE, Read ND, Seiler S, Bell-  
705 Pedersen D, Paietta J, Plesofsky N, et al: **Lessons from the genome sequence of**  
706 ***Neurospora crassa*: Tracing the path from genomic blueprint to multicellular**  
707 **organism**. *Microbiology and Molecular Biology Reviews* 2004, **68**:1-108.
- 708 29. Galagan JE, Calvo SE, Borkovich KA, Selker EU, Read ND, Jaffe D, FitzHugh W, Ma L-J,  
709 Smirnov S, Purcell S, et al: **The genome sequence of the filamentous fungus**  
710 ***Neurospora crassa***. *Nature* 2003, **422**:859-868.
- 711 30. Galazka JM, Klocko AD, Uesaka M, Honda S, Selker EU, Freitag M: ***Neurospora***  
712 **chromosomes are organized by blocks of importin alpha-dependent**  
713 **heterochromatin that are largely independent of H3K9me3**. *Genome Research*  
714 2016, **26**:1069-1080.
- 715 31. Corcoran P, Dettman JR, Sun Y, Luque EM, Corrochano LM, Taylor JW, Lascoux M,  
716 Johannesson H: **A global multilocus analysis of the model fungus *Neurospora***  
717 **reveals a single recent origin of a novel genetic system**. *Molecular Phylogenetics*  
718 *and Evolution* 2014, **78**:136-147.
- 719 32. Corcoran P, Jacobson DJ, Bidartondo MI, Hickey PC, Kerekes JF, Taylor JW,  
720 Johannesson H: **Quantifying functional heterothallism in the pseudohomothallic**  
721 **ascomycete *Neurospora tetrasperma***. *Fungal Biology* 2012, **116**:962-975.
- 722 33. Dettman JR, Jacobson DJ, Taylor JW: **A multilocus genealogical approach to**  
723 **phylogenetic species recognition in the model eukaryote *Neurospora***. *Evolution*  
724 2003, **57**:2703-2720, 2718.
- 725 34. Villalta CF, Jacobson DJ, Taylor JW: **Three new phylogenetic and biological**  
726 ***Neurospora* species: *N. hispaniola*, *N. metzenbergii* and *N. perkinsii***. *Mycologia*  
727 2009, **101**:777-789.
- 728 35. Whittle CA, Johannesson H: ***Neurospora* as a model to empirically test central**  
729 **hypotheses in eukaryotic genome evolution**. *BioEssays* 2012, **34**:934-937.
- 730 36. Corcoran P, Anderson JL, Jacobson DJ, Sun Y, Ni P, Lascoux M, Johannesson H:  
731 **Introgression maintains the genetic integrity of the mating-type determining**  
732 **chromosome of the fungus *Neurospora tetrasperma***. *Genome Research* 2016,  
733 **26**:486-498.

- 734 37. Menkis A, Bastiaans E, Jacobson DJ, Johannesson H: **Phylogenetic and biological**  
735 **species diversity within the *Neurospora tetrasperma* complex.** *Journal of*  
736 *Evolutionary Biology* 2009, **22**:1923-1936.
- 737 38. Grigoriev IV, Nordberg H, Shabalov I, Aerts A, Cantor M, Goodstein D, Kuo A,  
738 Minovitsky S, Nikitin R, Ohm RA, et al: **The Genome Portal of the Department of**  
739 **Energy Joint Genome Institute.** *Nucleic Acids Research* 2011, **40**:D26-D32.
- 740 39. Svedberg J, Hosseini S, Chen J, Vogan AA, Mozgova I, Hennig L, Manitchotpisit P,  
741 Abusharekh A, Hammond TM, Lascoux M, Johannesson H: **Convergent evolution of**  
742 **complex genomic rearrangements in two fungal meiotic drive elements.** *Nature*  
743 *Communications* 2018, **9**:4242.
- 744 40. Hosseini S, Meunier C, Nguyen D, Reimegård J, Johannesson H: **Comparative analysis**  
745 **of genome-wide DNA methylation in *Neurospora*.** *Epigenetics* 2020:1-16.
- 746 41. Jacobson DJ, Dettman JR, Adams RI, Boesl C, Sultana S, Roenneberg T, Merrow M,  
747 Duarte M, Marques I, Ushakova A, et al: **New findings of *Neurospora* in Europe and**  
748 **comparisons of diversity in temperate climates on continental scales.** *Mycologia*  
749 2006, **98**:550-559.
- 750 42. Sun Y, Svedberg J, Hiltunen M, Corcoran P, Johannesson H: **Large-scale suppression**  
751 **of recombination predates genomic rearrangements in *Neurospora tetrasperma*.**  
752 *Nature Communications* 2017, **8**:1140.
- 753 43. Svedberg J, Vogan AA, Rhoades NA, Sarmarajeewa D, Jacobson DJ, Lascoux M,  
754 Hammond TM, Johannesson H: **An introgressed gene causes meiotic drive in**  
755 ***Neurospora sitophila*.** *bioRxiv* 2020:2020.2001.2029.923946.
- 756 44. Ellison CE, Stajich JE, Jacobson DJ, Natvig DO, Lapidus A, Foster B, Aerts A, Riley R,  
757 Lindquist EA, Grigoriev IV, Taylor JW: **Massive changes in genome architecture**  
758 **accompany the transition to self-fertility in the filamentous fungus *Neurospora***  
759 ***tetrasperma*.** *Genetics* 2011, **189**:55-69.
- 760 45. Perkins DD, Radford A, Sachs MS: *The Neurospora compendium: Chromosomal loci.*  
761 San Diego, California: Academic Press; 2001.
- 762 46. Gioti A, Mushegian AA, Strandberg R, Stajich JE, Johannesson H: **Unidirectional**  
763 **evolutionary transitions in fungal mating systems and the role of transposable**  
764 **elements.** *Molecular Biology and Evolution* 2012, **29**:3215-3226.
- 765 47. Selker EU, Tountas NA, Cross SH, Margolin BS, Murphy JG, Bird AP, Freitag M: **The**  
766 **methyated component of the *Neurospora crassa* genome.** *Nature* 2003, **422**:893-  
767 897.
- 768 48. Wang Y, Smith KM, Taylor JW, Freitag M, Stajich JE: **Endogenous small RNA**  
769 **mediates meiotic silencing of a novel DNA transposon.** *G3:*  
770 *Genes/Genomes/Genetics* 2015, **5**:1949-1960.
- 771 49. Nguyen D, Peona V, Unneberg P, Suh A, Jern P, Johannesson H: **Datasets deposited**  
772 **for Nguyen et al (2020) 'Transposons and genome dynamics in the fungal genus**  
773 ***Neurospora*: insights from nearly gapless genome assemblies'.** Figshare  
774 <https://doi.org/10.6084/m9.figshare.c.4310996>; 2020.
- 775 50. Lewis ZA, Honda S, Khlaifallah TK, Jeffress JK, Freitag M, Mohn F, Schübeler D, Selker  
776 EU: **Relics of repeat-induced point mutation direct heterochromatin formation in**  
777 ***Neurospora crassa*.** *Genome Research* 2009, **19**:427-437.
- 778 51. Parfrey LW, Lahr DJG, Katz LA: **The dynamic nature of eukaryotic genomes.**  
779 *Molecular Biology and Evolution* 2008, **25**:787-794.

- 780 52. Blommaert J, Riss S, Hecox-Lea B, Mark Welch DB, Stelzer CP: **Small, but surprisingly**  
781 **repetitive genomes: transposon expansion and not polyploidy has driven a**  
782 **doubling in genome size in a metazoan species complex.** *BMC Genomics* 2019,  
783 **20**:466.
- 784 53. Daboussi M-J, Capy P: **Transposable elements in filamentous fungi.** *Annual Review*  
785 *of Microbiology* 2003, **57**:275-299.
- 786 54. Kim JM, Vanguri S, Boeke JD, Gabriel A, Voytas DF: **Transposable elements and**  
787 **genome organization: A comprehensive survey of retrotransposons revealed by**  
788 **the complete *Saccharomyces cerevisiae* genome sequence.** *Genome Research*  
789 1998, **8**:464-478.
- 790 55. Wicker T, Oberhaensli S, Parlange F, Buchmann JP, Shatalina M, Roffler S, Ben-David  
791 R, Doležal J, Šimková H, Schulze-Lefert P, et al: **The wheat powdery mildew genome**  
792 **shows the unique evolution of an obligate biotroph.** *Nature Genetics* 2013,  
793 **45**:1092-1096.
- 794 56. Kalendar R, Tanskanen J, Immonen S, Nevo E, Schulman AH: **Genome evolution of**  
795 **wild barley (*Hordeum spontaneum*) by *BARE-1* retrotransposon dynamics in**  
796 **response to sharp microclimatic divergence.** *Proceedings of the National Academy*  
797 *of Sciences* 2000, **97**:6603-6607.
- 798 57. Black WC, Rai KS: **Genome evolution in mosquitoes: intraspecific and interspecific**  
799 **variation in repetitive DNA amounts and organization.** *Genetical Research* 2009,  
800 **51**:185-196.
- 801 58. Jedlicka P, Lexa M, Vanat I, Hobza R, Kejnovsky E: **Nested plant LTR**  
802 **retrotransposons target specific regions of other elements, while all LTR**  
803 **retrotransposons often target palindromes and nucleosome-occupied regions: in**  
804 **silico study.** *Mobile DNA* 2019, **10**:50.
- 805 59. Gladyshev E, Kleckner N: **Recombination-independent recognition of DNA**  
806 **homology for repeat-induced point mutation.** *Current Genetics* 2016:1-12.
- 807 60. Rountree MR, Selker EU: **Genome defense: the *Neurospora* paradigm.** In  
808 *Epigenomics*. Springer; 2009: 321-341
- 809 61. Vitte C, Panaud O: **Formation of Solo-LTRs Through Unequal Homologous**  
810 **Recombination Counterbalances Amplifications of LTR Retrotransposons in Rice**  
811 ***Oryza sativa* L.** *Molecular Biology and Evolution* 2003, **20**:528-540.
- 812 62. Kidwell MG: **Transposable elements and the evolution of genome size in**  
813 **eukaryotes.** *Genetica* 2002, **115**:49-63.
- 814 63. Oliver KR, McComb JA, Greene WK: **Transposable elements: Powerful contributors**  
815 **to angiosperm evolution and diversity.** *Genome Biology and Evolution* 2013, **5**:1886-  
816 1901.
- 817 64. Gregory TR, Johnston JS: **Genome size diversity in the family Drosophilidae.**  
818 *Heredity* 2008, **101**:228-238.
- 819 65. Hu TT, Pattyn P, Bakker EG, Cao J, Cheng J-F, Clark RM, Fahlgren N, Fawcett JA,  
820 Grimwood J, Gundlach H, et al: **The *Arabidopsis lyrata* genome sequence and the**  
821 **basis of rapid genome size change.** *Nature Genetics* 2011, **43**:476-481.
- 822 66. Legrand S, Caron T, Maumus F, Schvartzman S, Quadrana L, Durand E, Gallina S,  
823 Pauwels M, Mazoyer C, Huyghe L, et al: **Differential retention of transposable**  
824 **element-derived sequences in outcrossing *Arabidopsis* genomes.** *Mobile DNA* 2019,  
825 **10**:30.

- 826 67. Kapusta A, Suh A, Feschotte C: **Dynamics of genome size evolution in birds and**  
827 **mammals.** *Proceedings of the National Academy of Sciences* 2017, **114**:E1460-E1469.
- 828 68. Gladyshev E: **Repeat-Induced Point mutation and other genome defense**  
829 **mechanisms in fungi.** *Microbiology Spectrum* 2017, **5**.
- 830 69. Graia F, Lespinet O, Rimbault B, Dequard-Chablat M, Coppin E, Picard M: **Genome**  
831 **quality control: RIP (repeat-induced point mutation) comes to *Podospora*.** *Mol*  
832 *Microbiol* 2001, **40**.
- 833 70. Bouhouche K, Zickler D, Debuchy R, Arnaise S: **Altering a gene involved in nuclear**  
834 **distribution increases the repeat-induced point mutation process in the fungus**  
835 ***Podospora anserina*.** *Genetics* 2004, **167**:151-159.
- 836 71. Ikeda K, Nakayashiki H, Kataoka T, Tamba H, Hashimoto Y, Tosa Y, Mayama S:  
837 **Repeat-induced point mutation (RIP) in *Magnaporthe grisea*: implications for its**  
838 **sexual cycle in the natural field context.** *Molecular Microbiology* 2002, **45**:1355-  
839 1364.
- 840 72. Idnurm A, Howlett BJ: **Analysis of loss of pathogenicity mutants reveals that repeat-**  
841 **induced point mutations can occur in the Dothideomycete *Leptosphaeria***  
842 ***maculans*.** *Fungal Genetics and Biology* 2003, **39**:31-37.
- 843 73. Coleman JJ, Rounsley SD, Rodriguez-Carres M, Kuo A, Wasmann CC, Grimwood J,  
844 Schmutz J, Taga M, White GJ, Zhou SG, et al: **The genome of *Nectria haematococca*:**  
845 **Contribution of supernumerary chromosomes to gene expansion.** *PLOS Genetics*  
846 2009, **5**.
- 847 74. Clutterbuck JA: **Genomic evidence of repeat-induced point mutation (RIP) in**  
848 **filamentous ascomycetes.** *Fungal Genetics and Biology* 2011, **48**:306-326.
- 849 75. John Clutterbuck A: **Genomic CG dinucleotide deficiencies associated with**  
850 **transposable element hypermutation in Basidiomycetes, some lower fungi, a moss**  
851 **and a clubmoss.** *Fungal Genetics and Biology* 2017.
- 852 76. Horns F, Petit E, Yockteng R, Hood ME: **Patterns of repeat-induced point mutation**  
853 **in transposable elements of basidiomycete fungi.** *Genome Biol Evol* 2012, **4**.
- 854 77. Friedman S, Freitag M: **Centrochromatin of Fungi.** In *Centromeres and Kinetochores:*  
855 *Discovering the Molecular Mechanisms Underlying Chromosome Inheritance.* Edited  
856 by Black BE. Cham: Springer International Publishing; 2017: 85-109
- 857 78. Smith KM, Galazka JM, Phatale PA, Connolly LR, Freitag M: **Centromeres of**  
858 **filamentous fungi.** *Chromosome Research* 2012, **20**:635-656.
- 859 79. Lerat E: **Identifying repeats and transposable elements in sequenced genomes:**  
860 **how to find your way through the dense forest of programs.** *Heredity* 2010,  
861 **104**:520-533.
- 862 80. Goerner-Potvin P, Bourque G: **Computational tools to unmask transposable**  
863 **elements.** *Nature Reviews Genetics* 2018, **19**:688-704.
- 864 81. Menendez-Arias L: **Mutation rates and intrinsic fidelity of retroviral reverse**  
865 **transcriptases.** *Viruses* 2009, **1**:1137-1165.
- 866 82. Katz RA, Skalka AM: **Generation of diversity in retroviruses.** *Annu Rev Genet* 1990,  
867 **24**:409-445.
- 868 83. Hood ME, Katawczik M, Giraud T: **Repeat-induced point mutation and the**  
869 **population structure of transposable elements in *Microbotryum violaceum*.**  
870 *Genetics* 2005, **170**:1081-1089.

- 871 84. Hubley R, Finn RD, Clements J, Eddy SR, Jones TA, Bao W, Smit AFA, Wheeler TJ: **The**  
872 **Dfam database of repetitive DNA families.** *Nucleic Acids Research* 2015, **44**:D81-  
873 D89.
- 874 85. Jurka J: **Repbase Update: a database and an electronic journal of repetitive**  
875 **elements.** *Trends in Genetics* 2000, **16**:418-420.
- 876 86. Consortium TU: **UniProt: a worldwide hub of protein knowledge.** *Nucleic Acids*  
877 *Research* 2018, **47**:D506-D515.
- 878 87. Marchler-Bauer A, Derbyshire MK, Gonzales NR, Lu S, Chitsaz F, Geer LY, Geer RC, He  
879 J, Gwadz M, Hurwitz DI, et al: **CDD: NCBI's conserved domain database.** *Nucleic*  
880 *Acids Research* 2014, **43**:D222-D226.
- 881 88. Vassetzky NS, Kramerov DA: **SINEBase: a database and tool for SINE analysis.**  
882 *Nucleic Acids Research* 2012, **41**:D83-D89.
- 883 89. Lowe TM, Chan PP: **tRNAscan-SE On-line: integrating search and context for**  
884 **analysis of transfer RNA genes.** *Nucleic Acids Research* 2016, **44**:W54-W57.
- 885 90. Altschul SF, Madden TL, Schäffer AA, Zhang J, Zhang Z, Miller W, Lipman DJ: **Gapped**  
886 **BLAST and PSI-BLAST: a new generation of protein database search programs.**  
887 *Nucleic Acids Research* 1997, **25**:3389-3402.
- 888 91. Kohany O, Gentles AJ, Hankus L, Jurka J: **Annotation, submission and screening of**  
889 **repetitive elements in Repbase: RepbaseSubmitter and Censor.** *BMC Bioinformatics*  
890 2006, **7**:474.
- 891 92. Bao W, Kojima KK, Kohany O: **Repbase Update, a database of repetitive elements in**  
892 **eukaryotic genomes.** *Mobile DNA* 2015, **6**.
- 893 93. Jurka J, Kapitonov VV, Pavlicek A, Klonowski P, Kohany O, Walichiewicz J: **Repbase**  
894 **Update, a database of eukaryotic repetitive elements.** *Cytogenetic and genome*  
895 *research* 2005, **110**.
- 896 94. Guichard E, Peona V, Malagoli Tagliazucchi G, Abitante L, Jagoda E, Musella M, Ricci  
897 M, Rubio-Roldán A, Sarno S, Luiselli D, et al: **Impact of non-LTR retrotransposons in**  
898 **the differentiation and evolution of anatomically modern humans.** *Mobile DNA*  
899 2018, **9**:28.
- 900 95. Rice P, Longden I, Bleasby A: **EMBOSS: The European molecular biology open**  
901 **software suite.** *Trends in Genetics* 2000, **16**:276-277.
- 902 96. Margolin BS, Garrett-Engele PW, Stevens JN, Fritz DY, Garrett-Engele C, Metzenberg  
903 RL, Selker EU: **A methylated *Neurospora* 5S rRNA pseudogene contains a**  
904 **transposable element inactivated by repeat-induced point mutation.** *Genetics*  
905 1998, **149**:1787-1797.
- 906 97. Muggeo VM, Muggeo MVM: **Package 'segmented'.** *Biometrika* 2017, **58**:516.
- 907 98. R Core Team: **R: A Language and Environment for Statistical Computing.** 3.1.3  
908 edition. Vienna, Austria: R Foundation for Statistical Computing; 2013.
- 909 99. Nygren K, Strandberg R, Wallberg A, Nabholz B, Gustafsson T, García D, Cano J,  
910 Guarro J, Johannesson H: **A comprehensive phylogeny of *Neurospora* reveals a link**  
911 **between reproductive mode and molecular evolution in fungi.** *Molecular*  
912 *Phylogenetics and Evolution* 2011, **59**:649-663.
- 913



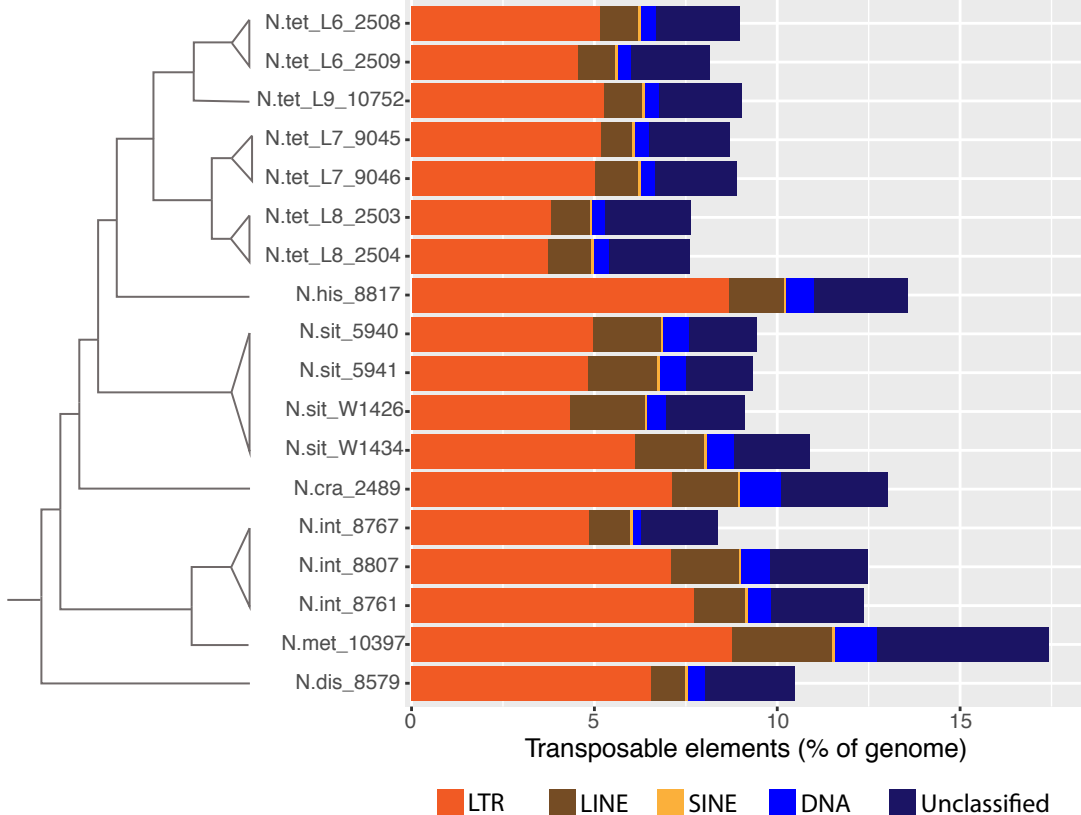

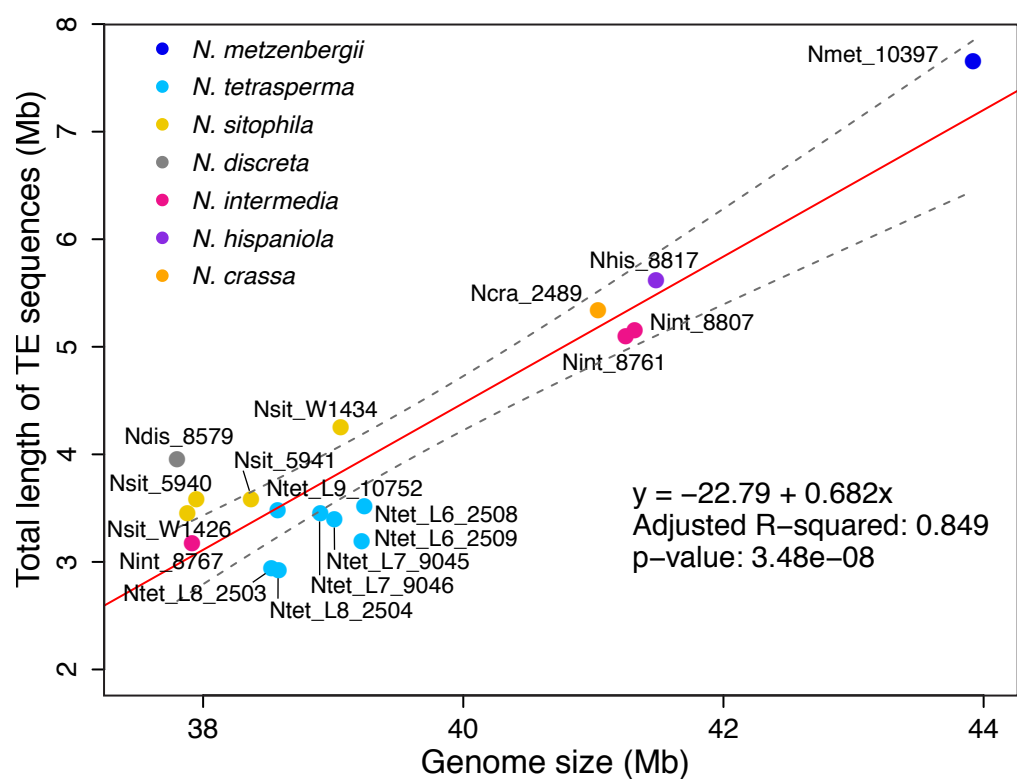

**a**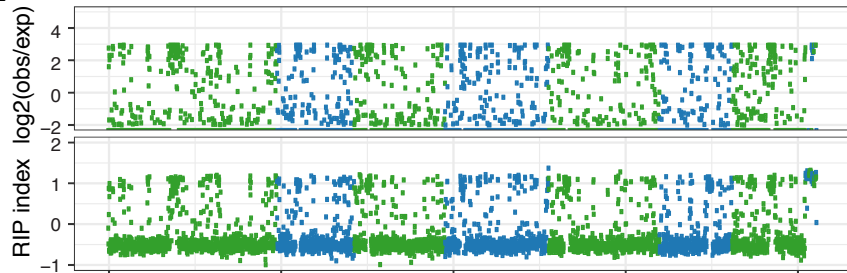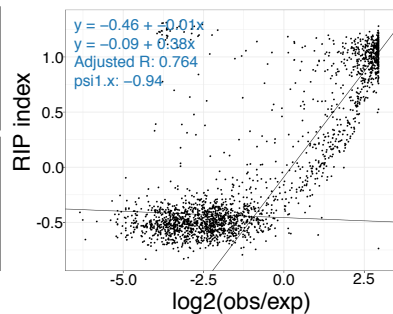**b**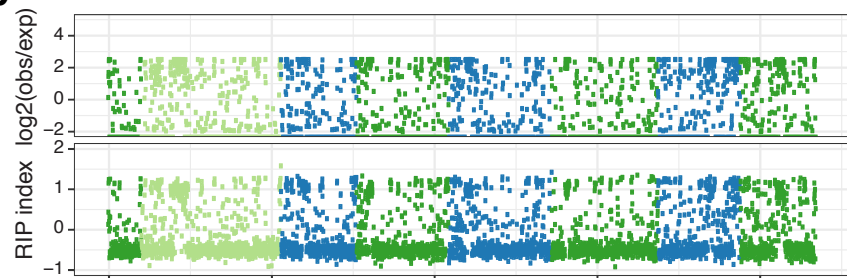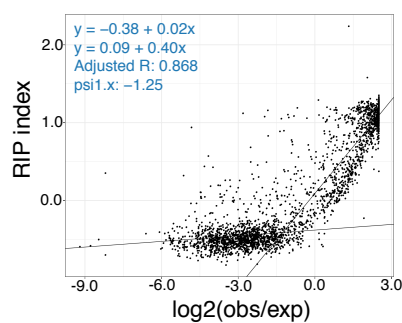**c**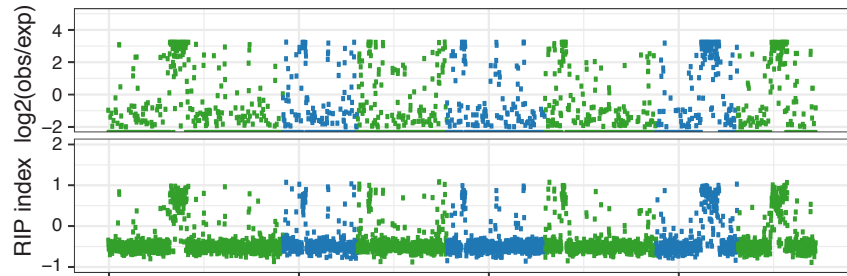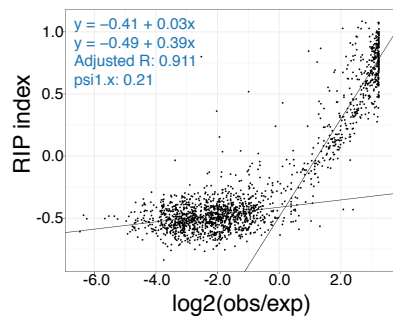

Source: http://biorxiv.org/content/10.1101/2020.09.27.311811v1.full.pdf
